# Supplementary material for: Triterpenoids of Three Apple Cultivars—Biosynthesis, Antioxidative and Anti-Inflammatory Properties, and Fate during Processing
Source: MDPI journal article supplement (doi:10.3390/molecules28062584), 2023-03-13
Supplement: s1 [file s1]

### Evaluation of leaf area

Two main dimensions were measured for each leaf – length (l) and width (w). The surfaces of leaves were assumed to be matching ellipses, while sides were ignored due to neglectable thickness of the leaves. The surface area of each of the fruit was estimated as:

$$A = \frac{\pi \cdot l \cdot w}{2}$$

### Evaluation of fruit area

Two main dimensions were measured for each fruit – height (h) and diameter (d). The fruit were assumed to be spheroids and, according to their height - diameter ratio, were classified to three groups: spherical (h = d), prolate (h > d), and oblate (h < d). The surface area of each of the fruit was estimated using one of the following equations:

- spherical fruit:

$$A = \pi \cdot d^2$$

- prolate fruit:

$$A = \frac{\pi \cdot d}{2} \cdot \left(1 + \frac{1-e^2}{e} \cdot \operatorname{artanh}(e)\right), \text{ where } e^2 = 1 - d^2/h^2$$

- oblate fruit:

$$A = \frac{\pi \cdot d}{2} \cdot \left(1 + \frac{c}{a \cdot e} \cdot \arcsin(e)\right), \text{ where } e^2 = 1 - h^2/d^2$$

Table S1. Content of triterpenoids in apple fruit. Only compounds detected in at least one sample were listed. All data in  $\mu\text{g}/\text{cm}^2$ . nd - not detected ( $\leq 0.2 \mu\text{g}/\text{cm}^2$ )

| Golden Delicious    |        |       |       |       |       |       |       |
|---------------------|--------|-------|-------|-------|-------|-------|-------|
| compound            |        | date  |       |       |       |       |       |
|                     |        | 3     | 4     | 5     | 6     | 7     | 8     |
| ursane family       |        |       |       |       |       |       |       |
| $\alpha$ -amyrin    | free   | 8.1   | 7.4   | 7.9   | 6.3   | 8.5   | 9.0   |
| uvaol               | free   | 6.1   | 5.3   | 6.0   | 7.1   | 5.4   | 4.1   |
| ursolic aldehyde    | free   | 0.9   | 1.2   | 0.9   | 1.1   | 1.0   | 1.3   |
| ursolic acid        | free   | 585.7 | 514.2 | 494.5 | 493.0 | 486.1 | 446.2 |
|                     | bonded | nd    | nd    | nd    | nd    | 5.3   | 13.1  |
| corosolic acid      | free   | 8.1   | 7.6   | 6.9   | 7.7   | 7.1   | 10.2  |
|                     | bonded | nd    | nd    | nd    | nd    | nd    | 1.1   |
| pomolic acid        | free   | 61.4  | 53.5  | 48.1  | 52.0  | 51.4  | 49.4  |
|                     | bonded | nd    | nd    | nd    | nd    | 1.1   | 4.1   |
| euscaphic acid      | free   | 4.2   | 2.9   | 4.0   | 3.6   | 3.1   | 3.7   |
| oleane family       |        |       |       |       |       |       |       |
| $\beta$ -amyrin     | free   | 8.4   | 6.9   | 7.0   | 7.7   | 6.6   | 7.1   |
| erythrodiol         | free   | 5.2   | 4.8   | 3.9   | 3.5   | 3.3   | 3.2   |
| oleanolic aldehyde  | free   | 1.3   | 0.8   | 0.7   | 1.1   | 1.5   | 1.2   |
| oleanolic acid      | free   | 205.2 | 183.3 | 172.9 | 168.4 | 166.8 | 166.1 |
|                     | bonded | nd    | nd    | nd    | nd    | 8.2   | 39.4  |
| maslinic acid       | free   | 2.1   | 3.3   | 2.8   | 2.3   | 3.1   | 2.8   |
| lupane family       |        |       |       |       |       |       |       |
| lupeol              | free   | 1.4   | 0.8   | 0.9   | 1.2   | 1.4   | 1.4   |
| betulinic acid      | free   | 37.2  | 33.1  | 28.9  | 30.6  | 26.1  | 30.2  |
|                     | bonded | nd    | nd    | nd    | nd    | 0.4   | 1.4   |
| sterols             |        |       |       |       |       |       |       |
| $\beta$ -sitosterol | free   | 34.1  | 36.4  | 33.7  | 37.0  | 38.8  | 35.2  |
|                     | bonded | nd    | nd    | nd    | nd    | 0.8   | 1.4   |
| stigmasterol        | free   | nd    | nd    | 0.4   | 0.5   | nd    | 0.4   |
| campesterol         | free   | 1.5   | 1.1   | 1.4   | 1.2   | 1.3   | 1.4   |
| cycloartanol        | free   | 0.4   | 0.6   | 0.4   | 0.5   | 0.7   | 0.6   |

Table S1. Continuation

| Ligol               |        |       |       |       |       |       |       |
|---------------------|--------|-------|-------|-------|-------|-------|-------|
| compound            |        | date  |       |       |       |       |       |
|                     |        | 3     | 4     | 5     | 6     | 7     | 8     |
| ursane family       |        |       |       |       |       |       |       |
| $\alpha$ -amyrin    | free   | 10.4  | 9.7   | 7.9   | 8.3   | 8.6   | 8.2   |
| uvaol               | free   | 6.8   | 5.3   | 6.1   | 4.8   | 4.2   | 5.1   |
| ursolic aldehyde    | free   | 2.0   | 1.3   | 1.4   | 1.7   | 1.7   | 1.4   |
| ursolic acid        | free   | 621.0 | 581.4 | 575.3 | 580.8 | 574.6 | 581.0 |
|                     | bonded | nd    | nd    | nd    | nd    | 5.1   | 12.1  |
| pomolic acid        | free   | 16.1  | 14.3  | 12.2  | 11.1  | 11.0  | 10.2  |
| oleane family       |        |       |       |       |       |       |       |
| $\beta$ -amyrin     | free   | 6.1   | 4.3   | 5.2   | 6.0   | 6.4   | 5.0   |
| erythrodiol         | free   | 2.8   | 1.7   | 2.1   | 2.3   | 2.0   | 2.1   |
| oleanolic aldehyde  | free   | 1.9   | 2.0   | 1.3   | 1.2   | 1.4   | 1.3   |
| oleanolic acid      | free   | 364.9 | 344.4 | 340.0 | 336.9 | 330.8 | 317.8 |
|                     | bonded | nd    | nd    | nd    | nd    | 10.5  | 38.1  |
| sterols             |        |       |       |       |       |       |       |
| $\beta$ -sitosterol | free   | 36.4  | 39.9  | 40.2  | 37.4  | 35.1  | 33.3  |
|                     | bonded | nd    | nd    | nd    | nd    | 0.5   | 1.7   |
| stigmasterol        | free   | 0.9   | 1.1   | 1.3   | 1.0   | 0.9   | 0.7   |
| campesterol         | free   | 1.2   | 0.9   | 0.9   | 1.0   | 1.3   | 1.0   |

Table S1. Continuation

| Redkroft            |        |       |       |       |       |       |       |
|---------------------|--------|-------|-------|-------|-------|-------|-------|
| compound            |        | date  |       |       |       |       |       |
|                     |        | 3     | 4     | 5     | 6     | 7     | 8     |
| ursane family       |        |       |       |       |       |       |       |
| $\alpha$ -amyrin    | free   | 7.1   | 6.0   | 5.8   | 7.3   | 6.2   | 6.3   |
| uvaol               | free   | 6.4   | 5.7   | 7.1   | 6.2   | 5.8   | 5.3   |
| ursolic aldehyde    | free   | 2.2   | 3.1   | 3.4   | 3.0   | 2.7   | 3.1   |
| ursolic acid        | free   | 708.1 | 655.2 | 658.3 | 647.8 | 651.5 | 630.4 |
|                     | bonded | nd    | nd    | nd    | nd    | 7.0   | 31.5  |
| oleane family       |        |       |       |       |       |       |       |
| $\beta$ -amyrin     | free   | 4.2   | 4.0   | 3.8   | 3.1   | 3.5   | 3.3   |
| erythrodiol         | free   | 2.2   | 2.6   | 2.4   | 2.6   | 2.9   | 2.9   |
| oleanolic aldehyde  | free   | 1.3   | 1.0   | 1.3   | 1.6   | 1.6   | 1.4   |
| oleanolic acid      | free   | 541.1 | 501.4 | 497.8 | 483.0 | 491.0 | 476.1 |
|                     | bonded | nd    | nd    | nd    | nd    | 18.4  | 63.1  |
| lupane family       |        |       |       |       |       |       |       |
| lupeol              | free   | 2.9   | 1.8   | 1.8   | 2.2   | 1.9   | 2.2   |
| betulin             | free   | 2.0   | 1.3   | 1.6   | 1.5   | 1.9   | 1.7   |
| betulinic acid      | free   | 64.3  | 59.1  | 53.4  | 55.0  | 48.6  | 52.1  |
|                     | bonded | nd    | nd    | nd    | nd    | 0.7   | 4.3   |
| sterols             |        |       |       |       |       |       |       |
| $\beta$ -sitosterol | free   | 35.1  | 36.2  | 34.8  | 41.3  | 34.2  | 37.4  |
|                     | bonded | nd    | nd    | nd    | nd    | 0.4   | 1.4   |
| campesterol         | free   | 1.4   | 1.1   | 1.5   | 1.3   | 1.2   | 1.2   |
| cycloartanol        | free   | 1.0   | 0.8   | 0.8   | 1.2   | 1.0   | 0.9   |

Table S2. Content of triterpenoids in apple leaves. Only compounds detected in at least one sample were listed. All data in  $\mu\text{g}/\text{cm}^2$ . nd - not detected ( $\leq 0.2 \mu\text{g}/\text{cm}^2$ )

| Golden Delicious    |        |      |      |      |      |      |      |      |
|---------------------|--------|------|------|------|------|------|------|------|
| compound            |        | date |      |      |      |      |      |      |
|                     |        | 1    | 2    | 3    | 4    | 5    | 6    | 7    |
| ursane family       |        |      |      |      |      |      |      |      |
| $\alpha$ -amyrin    | free   | 3.6  | 4.2  | 4.5  | 3.8  | 4.0  | 3.8  | 4.1  |
|                     | bonded | nd   | 0.4  | 0.6  | 0.7  | 0.4  | 0.4  | 0.6  |
| uvaol               | free   | 2.0  | 1.8  | 2.4  | 2.4  | 2.2  | 2.5  | 2.1  |
|                     | bonded | nd   | nd   | nd   | 0.2  | nd   | 0.3  | nd   |
| ursolic acid        | free   | 35.4 | 48.1 | 62.6 | 66.1 | 63.3 | 65.0 | 61.2 |
|                     | bonded | nd   | 3.1  | 10.6 | 11.7 | 12.5 | 11.9 | 12.2 |
| pomolic acid        | free   | nd   | 0.8  | 1.1  | 1.6  | 1.5  | 1.6  | 1.4  |
|                     | bonded | nd   | nd   | nd   | nd   | 0.2  | 0.3  | nd   |
| oleane family       |        |      |      |      |      |      |      |      |
| $\beta$ -amyrin     | free   | 1.8  | 2.4  | 1.9  | 1.7  | 2.1  | 1.9  | 2.0  |
|                     | bonded | nd   | nd   | nd   | nd   | 0.4  | 0.4  | nd   |
| erythrodiol         | free   | 0.8  | 1.0  | 1.1  | 0.8  | 1.2  | 1.1  | 1.1  |
| oleanolic acid      | free   | 13.4 | 16.5 | 25.1 | 22.5 | 23.9 | 23.1 | 24.0 |
|                     | bonded | nd   | 4.7  | 16.2 | 17.1 | 19.0 | 18.4 | 18.4 |
| lupane family       |        |      |      |      |      |      |      |      |
| betulinic acid      | free   | 0.5  | 1.0  | 1.5  | 1.4  | 1.5  | 1.7  | 1.6  |
| sterols             |        |      |      |      |      |      |      |      |
| $\beta$ -sitosterol | free   | 44.3 | 46.1 | 48.3 | 44.0 | 43.2 | 47.5 | 45.8 |
|                     | bonded | nd   | 1.0  | 1.7  | 2.5  | 2.8  | 2.1  | 2.6  |
| stigmasterol        | free   | 1.0  | 0.6  | 0.8  | 1.0  | 1.1  | 0.8  | 0.7  |
| campesterol         | free   | 1.5  | 1.3  | 1.7  | 1.8  | 1.6  | 1.5  | 1.7  |
| cycloartanol        | free   | 0.6  | 0.4  | 0.6  | 0.3  | 0.5  | 0.4  | 0.5  |

Table S2. Continuation

| Ligol               |        |      |      |      |      |      |      |      |
|---------------------|--------|------|------|------|------|------|------|------|
| compound            |        | date |      |      |      |      |      |      |
|                     |        | 1    | 2    | 3    | 4    | 5    | 6    | 7    |
| ursane family       |        |      |      |      |      |      |      |      |
| $\alpha$ -amyrin    | free   | 6.3  | 5.1  | 5.8  | 7.0  | 6.1  | 5.6  | 5.2  |
|                     | bonded | nd   | nd   | 0.4  | 0.7  | 1.1  | 1.0  | 0.8  |
| uvaol               | free   | 1.6  | 2.1  | 2.3  | 2.0  | 1.8  | 2.1  | 1.7  |
|                     | bonded | nd   | nd   | nd   | nd   | 0.3  | 0.3  | nd   |
| ursolic aldehyde    | free   | nd   | nd   | 0.4  | nd   | nd   | 0.3  | nd   |
| ursolic acid        | free   | 29.2 | 46.8 | 69.9 | 73.1 | 68.5 | 69.0 | 71.9 |
|                     | bonded | nd   | 4.2  | 11.1 | 13.2 | 14.0 | 12.8 | 13.9 |
| pomolic acid        | free   | nd   | nd   | 0.4  | 0.5  | nd   | 0.6  | 0.7  |
| oleane family       |        |      |      |      |      |      |      |      |
| $\beta$ -amyrin     | free   | 4.0  | 5.1  | 5.2  | 5.0  | 4.8  | 4.6  | 4.9  |
|                     | bonded | nd   | nd   | 0.5  | 0.4  | nd   | 0.4  | 0.6  |
| erythrodiol         | free   | 0.9  | 1.3  | 1.2  | 1.6  | 1.3  | 1.5  | 1.4  |
| oleanolic acid      | free   | 17.1 | 26.8 | 41.0 | 44.3 | 45.5 | 41.9 | 43.4 |
|                     | bonded | nd   | 3.2  | 10.0 | 12.3 | 12.5 | 11.8 | 12.1 |
| sterols             |        |      |      |      |      |      |      |      |
| $\beta$ -sitosterol | free   | 42.7 | 44.8 | 42.1 | 46.3 | 43.0 | 44.1 | 48.3 |
|                     | bonded | nd   | 0.6  | 1.3  | 2.6  | 2.8  | 3.2  | 3.4  |
| stigmasterol        | free   | 0.6  | 0.9  | 1.1  | 0.8  | 1.0  | 0.9  | 0.7  |
| campesterol         | free   | 1.3  | 1.1  | 1.1  | 1.0  | 1.2  | 1.0  | 1.2  |

Table S2. Continuation

| Redkroft            |        |      |      |      |      |      |      |      |
|---------------------|--------|------|------|------|------|------|------|------|
| compound            |        | date |      |      |      |      |      |      |
|                     |        | 1    | 2    | 3    | 4    | 5    | 6    | 7    |
| ursane family       |        |      |      |      |      |      |      |      |
| $\alpha$ -amyrin    | free   | 3.5  | 4.0  | 3.5  | 3.1  | 3.9  | 4.2  | 3.7  |
|                     | bonded | nd   | 0.4  | 0.6  | 0.4  | nd   | 0.5  | 0.5  |
| uvaol               | free   | 1.7  | 1.1  | 1.0  | 1.7  | 1.5  | 1.6  | 1.9  |
|                     | bonded | nd   | nd   | 0.5  | nd   | 0.4  | nd   | nd   |
| ursolic acid        | free   | 22.4 | 38.6 | 57.2 | 60.3 | 58.7 | 55.5 | 57.3 |
|                     | bonded | nd   | 9.5  | 16.8 | 15.7 | 19.0 | 17.6 | 18.3 |
| oleane family       |        |      |      |      |      |      |      |      |
| $\beta$ -amyrin     | free   | 2.3  | 3.2  | 2.1  | 1.8  | 2.2  | 2.1  | 2.6  |
|                     | bonded | nd   | nd   | nd   | nd   | nd   | 0.4  | nd   |
| erythrodiol         | free   | 0.6  | nd   | 0.5  | 0.7  | 0.7  | 1.0  | 0.8  |
| oleanolic acid      | free   | 18.2 | 33.3 | 49.1 | 50.0 | 48.4 | 49.7 | 46.5 |
|                     | bonded | nd   | 14.5 | 29.6 | 33.0 | 28.5 | 28.9 | 31.5 |
| lupane family       |        |      |      |      |      |      |      |      |
| lupeol              | free   | nd   | nd   | 0.5  | 0.5  | 0.4  | 0.4  | nd   |
| betulinic acid      | free   | 6.0  | 7.6  | 8.2  | 8.5  | 8.1  | 9.0  | 8.2  |
|                     | bonded | nd   | 0.6  | 0.6  | 0.4  | 0.5  | 0.5  | 0.9  |
| sterols             |        |      |      |      |      |      |      |      |
| $\beta$ -sitosterol | free   | 46.2 | 44.1 | 42.5 | 46.0 | 42.5 | 46.0 | 44.7 |
|                     | bonded | nd   | 1.2  | 1.9  | 2.3  | 2.7  | 2.3  | 2.5  |
| campesterol         | free   | 0.8  | 1.1  | 1.2  | 1.3  | 1.1  | 1.1  | 1.0  |
| cycloartanol        | free   | 0.4  | 0.3  | nd   | 0.5  | 0.4  | 0.4  | 0.5  |
